# Supplementary material
Source: PubMed Central journal article supplement (PMC3191283)
Supplement: NIHMS292421-supplement-01.pdf [file NIHMS292421-supplement-01.pdf]

**Supplementary Table S1. LC-MS/MS analysis of nitrated BSA.** BSA treated with TNM for 1 h was trypsin digested and analyzed by LC-MS/MS with the QSTAR Elite. 24 nitrated peptides were detected using the Mascot search algorithm.

| Peptide Order | Observed m/z | Mr(calc) (Da) | Mass error (ppm) | Expect. Value | Peptide Score | Missed clvg. site | Peptide Sequence                                                             |
|---------------|--------------|---------------|------------------|---------------|---------------|-------------------|------------------------------------------------------------------------------|
| 1             | 486.7434     | 971.4712      | 1                | 0.00011       | 40            | 0                 | K.YLYE <sup>Y</sup> IA <sup>R</sup> .R + Nitro (Y)                           |
| 2             | 509.2375     | 1016.4563     | 4                | 6e-006        | 52            | 0                 | K.YLYE <sup>Y</sup> IA <sup>R</sup> .R + 2 Nitro (Y)                         |
| 3             | 376.8764     | 1127.5723     | 31               | 0.011         | 19            | 1                 | K.YLYE <sup>Y</sup> IA <sup>R</sup> .H + Nitro (Y)                           |
| 4             | 391.8644     | 1172.5574     | 12               | 0.045         | 13            | 1                 | K.YLYE <sup>Y</sup> IA <sup>R</sup> .H + 2 Nitro (Y)                         |
| 5             | 495.6155     | 1483.7895     | 24               | 6.4e-008      | 72            | 1                 | R.RHPE <sup>Y</sup> AVSVLLR.L + Nitro (Y)                                    |
| 6             | 744.8258     | 1487.6198     | 12               | 3e-009        | 85            | 0                 | K.YICD <sup>Y</sup> NQDTISSK.L + Nitro (Y)                                   |
| 7             | 762.2674     | 1522.5010     | 13               | 7e-007        | 62            | 0                 | R.ET <sup>Y</sup> GDMAD <sup>C</sup> CCEK.Q + Nitro (Y)                      |
| 8             | 770.2659     | 1538.4960     | 14               | 8.7e-008      | 71            | 0                 | R.ET <sup>Y</sup> GDMAD <sup>C</sup> CCEK.Q + Nitro (Y) + Oxid (M)           |
| 9             | 726.9575     | 2177.7936     | 26               | 2.5e-006      | 56            | 1                 | R.ET <sup>Y</sup> GDMAD <sup>C</sup> CCEKQEPER.N + Nitro (Y) + Oxid (M)      |
| 10            | 689.2893     | 2064.8187     | 13               | 5.5e-006      | 53            | 1                 | K.VASLRE <sup>Y</sup> TGDMAD <sup>C</sup> CCEK.Q + Nitro (Y) + Oxid (M)      |
| 11            | 762.9055     | 1523.7732     | 15               | 2.7e-014      | 136           | 0                 | K.LGE <sup>Y</sup> GFQNALIVR.Y + Nitro (Y)                                   |
| 12            | 519.2316     | 2072.0803     | 394              | 0.049         | 13            | 2                 | K.LGE <sup>Y</sup> GFQNALIVR <sup>Y</sup> TRK.V + Nitro (Y)                  |
| 13            | 774.3158     | 1546.5915     | 17               | 1.6e-009      | 88            | 0                 | K.E <sup>Y</sup> EATLEECCA <sup>K</sup> .D + Nitro (Y)                       |
| 14            | 620.6228     | 1858.8077     | 21               | 4.4e-008      | 74            | 1                 | R.LAKE <sup>Y</sup> EATLEECCA <sup>K</sup> .D + Nitro (Y)                    |
| 15            | 533.8935     | 1598.6308     | 18               | 2.7e-006      | 56            | 0                 | K.DDPHAC <sup>Y</sup> STVFDK.L + Nitro (Y)                                   |
| 16            | 614.2873     | 1839.8098     | 17               | 4.6e-007      | 63            | 1                 | K.DDPHAC <sup>Y</sup> STVFDK <sup>L</sup> .H + Nitro (Y)                     |
| 17            | 806.8784     | 1611.7205     | 13               | 3.9e-007      | 64            | 0                 | K.DAFLGSFL <sup>Y</sup> E <sup>Y</sup> SR.R + Nitro (Y)                      |
| 18            | 829.3727     | 1656.7056     | 15               | 0.00013       | 39            | 0                 | K.DAFLGSFL <sup>Y</sup> E <sup>Y</sup> SR.R + 2 Nitro (Y)                    |
| 19            | 595.9574     | 1784.8073     | 24               | 2.4e-006      | 56            | 0                 | R.M <sup>P</sup> CTED <sup>Y</sup> LSLILNR.L + Nitro (Y) + Oxid (M)          |
| 20            | 896.8625     | 1791.6828     | 15               | 6.4e-010      | 92            | 0                 | K. <sup>Y</sup> NGVFQ <sup>E</sup> CCQAEDK.G + Nitro (Y)                     |
| 21            | 844.7180     | 2531.0879     | 18               | 8.1e-006      | 51            | 1                 | K. <sup>Y</sup> NGVFQ <sup>E</sup> CCQAEDK <sup>G</sup> ACLLPK.I + Nitro (Y) |
| 22            | 642.6492     | 1924.8989     | 14               | 3.7e-007      | 64            | 0                 | R.RPCFSALTPDET <sup>Y</sup> VPK.A + Nitro (Y)                                |
| 23            | 523.3000     | 2089.0057     | 79               | 0.027         | 16            | 1                 | R.RHP <sup>Y</sup> F <sup>Y</sup> APPELLY <sup>Y</sup> ANK.Y + Nitro (Y)     |
| 24            | 712.3465     | 2133.9908     | 13               | 7.4e-005      | 41            | 1                 | R.RHP <sup>Y</sup> F <sup>Y</sup> APPELLY <sup>Y</sup> ANK.Y + 2 Nitro (Y)   |
