# Supplementary material
Source: PubMed Central journal article supplement (PMC3191283)
Supplement: NIHMS292421-supplement-05.pdf [file NIHMS292421-supplement-05.pdf]

# Supplementary Figure S1

## A

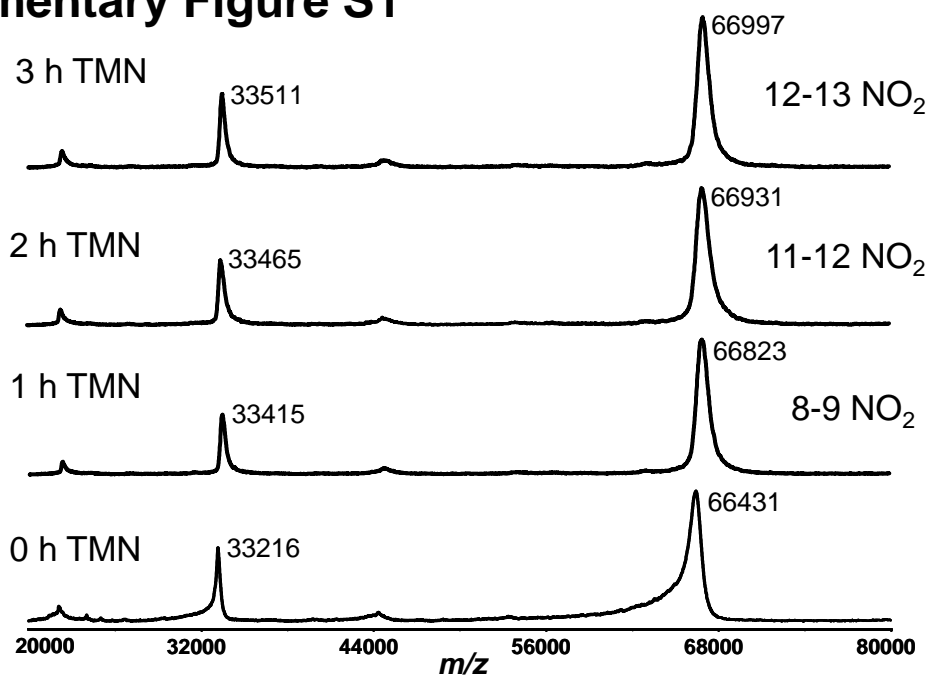

## B

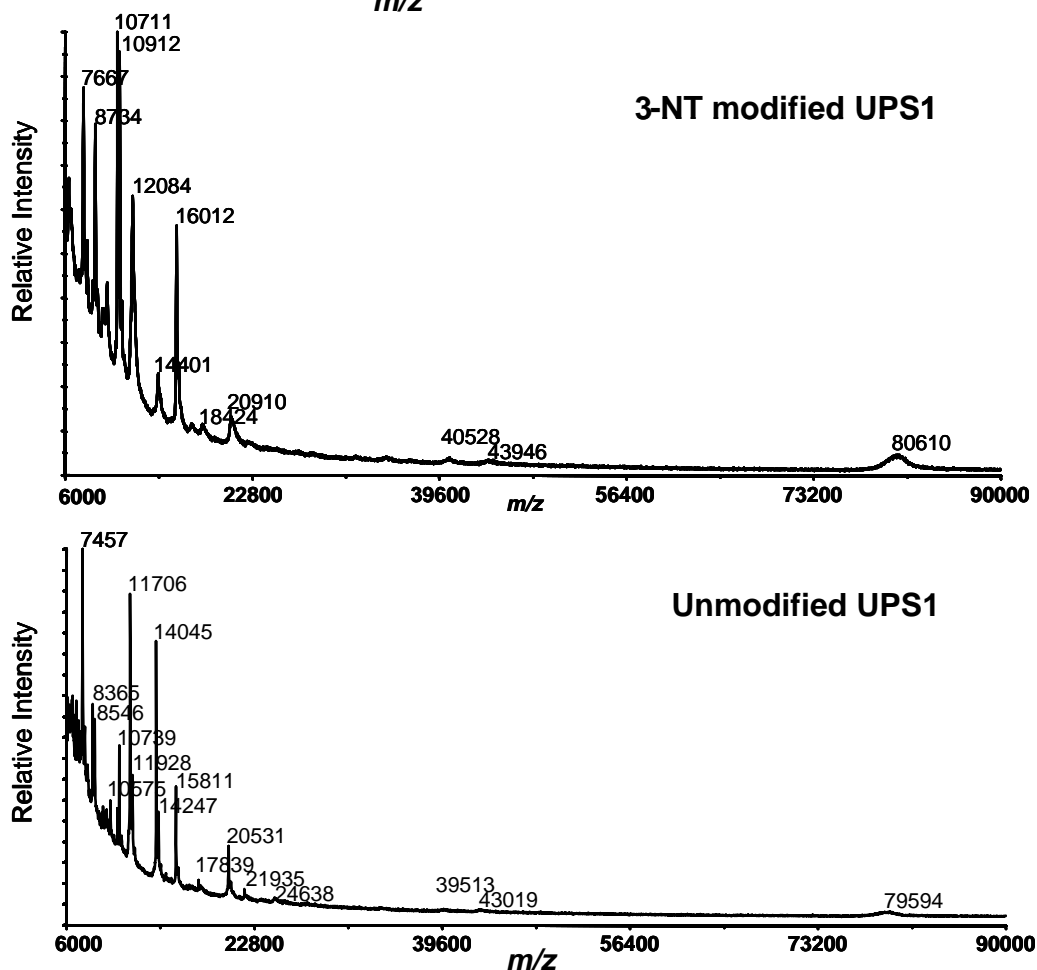

**Supplementary Figure S1: BSA nitration by TMN.** A) Extent of nitration of undigested, intact BSA after 0, 1, 2, and 3 h TMN reactions analyzed by MALDI-TOF mass spectrometry. The average number of nitro groups ( $\text{NO}_2$ , 45 Da each) added to each BSA molecule based on the measured mass increase is listed. B) Increased shifts in mass were observed after one hour nitration reaction of protein mixture UPS1 with tetranitromethane (top) as compared to unmodified UPS1 (below) in MALDI-TOF mass spectrometry.
