# Supplementary material
Source: PubMed Central journal article supplement (PMC3191283)
Supplement: NIHMS292421-supplement-06.pdf [file NIHMS292421-supplement-06.pdf]

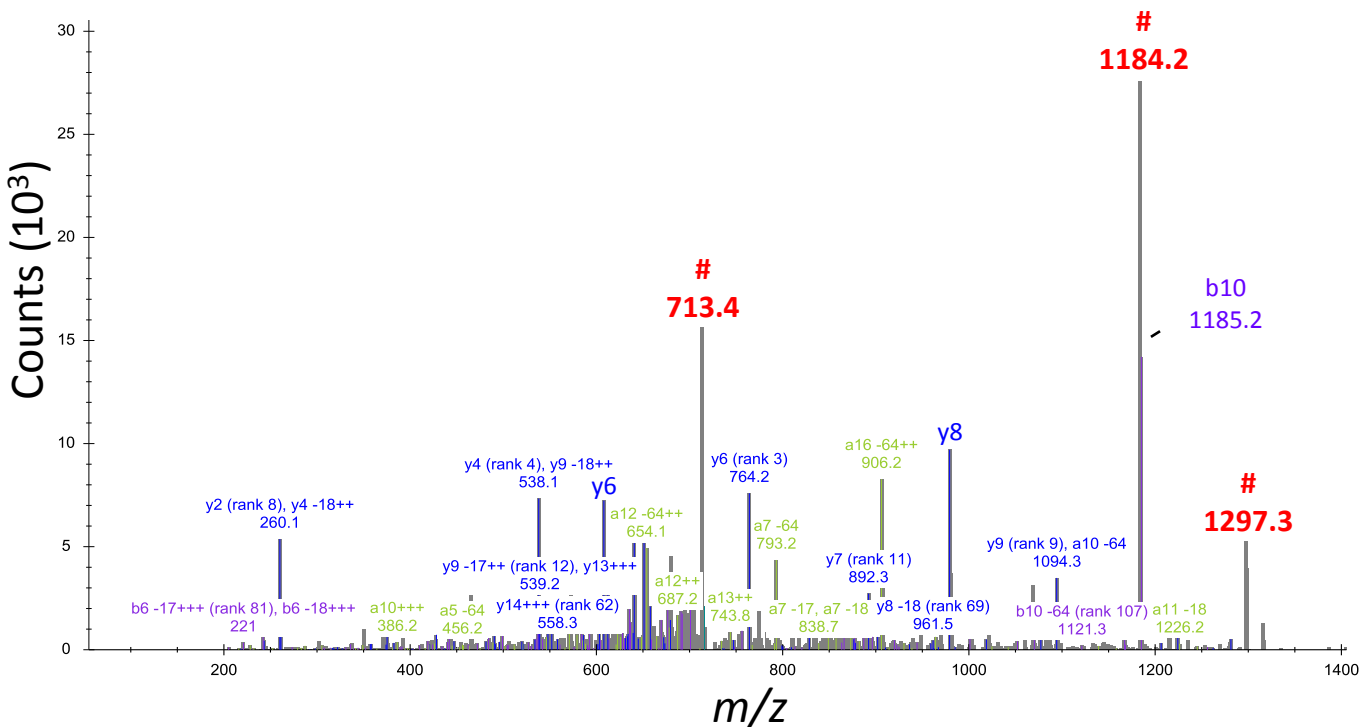

**Supplementary Figure S2: Example of an LTQ Velos MS/MS spectrum with an expectation value <0.05 that was rejected after manual assessment due to our spectral quality control criteria.** This MS/MS spectrum was acquired by the Velos LTQ for precursor ion  $m/z$  at  $722.02^{3+}$  was initially assigned to a tyrosine nitrated, methionine sulfoxide modified peptide (ETLM<sup>ox</sup>GKY<sup>NO2</sup>GEDSKLIYDLK) by the search engine Mascot with an expectation value of 0.021 (searching against SwissProt). However, even though many fragment ions could be assigned to b or y ions, abundant peaks (several above 50% of the base peak) remained unassigned (indicated in red letters), and could not be accounted for, i.e. at  $m/z$  713.4, 1184.2, and 1297.3. Thus this peptide was not accepted and not entered into the list of LTQ Velos identified peptides.
