# Supplementary material
Source: PubMed Central journal article supplement (PMC3191283)

# Supplementary Figure S3

## AKTDHGAEIVYK (MH<sub>2</sub><sup>2+</sup>, 666.4 m/z)

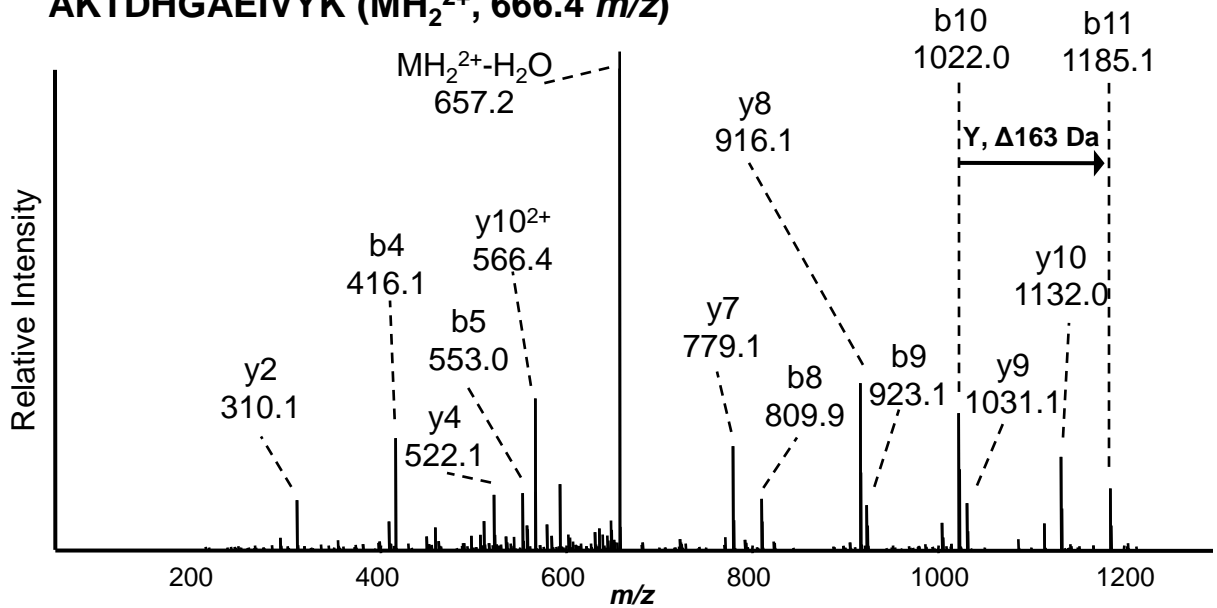

## AKTDHGAEIVY(NO<sub>2</sub>)K (MH<sub>2</sub><sup>2+</sup>, 688.8 m/z)

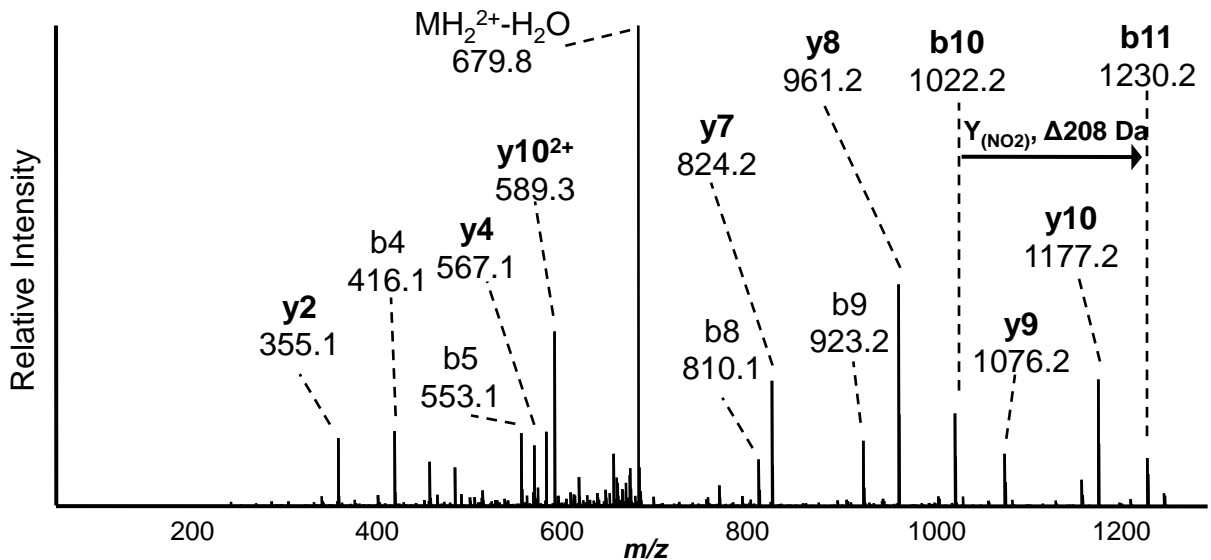

**Supplementary Figure S3: Detailed MS/MS spectra annotation of the nitrated and unmodified peptide AKTDHGAEIVYK from the microtubule-associated protein Tau.** The nitrated AKTDHGAEIVY(NO<sub>2</sub>)K was one of many 3NT peptides detected only by the LTQ Velos in our dataset. Detailed annotation of the MS/MS spectra reveals that almost all ions are the same between the nitrated and unmodified peptide. Ions that are shifted in mass by 45 Da due to the 3NT modification are boldfaced. The b9 ion has the same *m/z* in both spectra but the b10 ion is shifted by 45 Da confirming the site of modification. In addition, y2 is shifted by 45 Da in the spectra of the 3NT modified peptide. Inset: The extracted ion chromatogram of the nitrated and unmodified peptides.

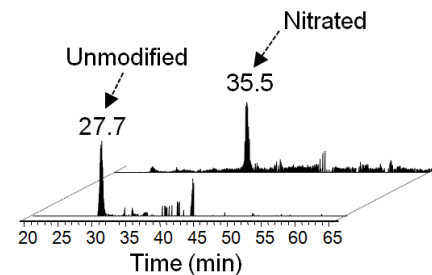

Supplement: NIHMS292421-supplement-07.pdf [file NIHMS292421-supplement-07.pdf]
