# Supplementary material
Source: PubMed Central journal article supplement (PMC3191283)
Supplement: NIHMS292421-supplement-08.pdf [file NIHMS292421-supplement-08.pdf]

## Supplementary Figure S4

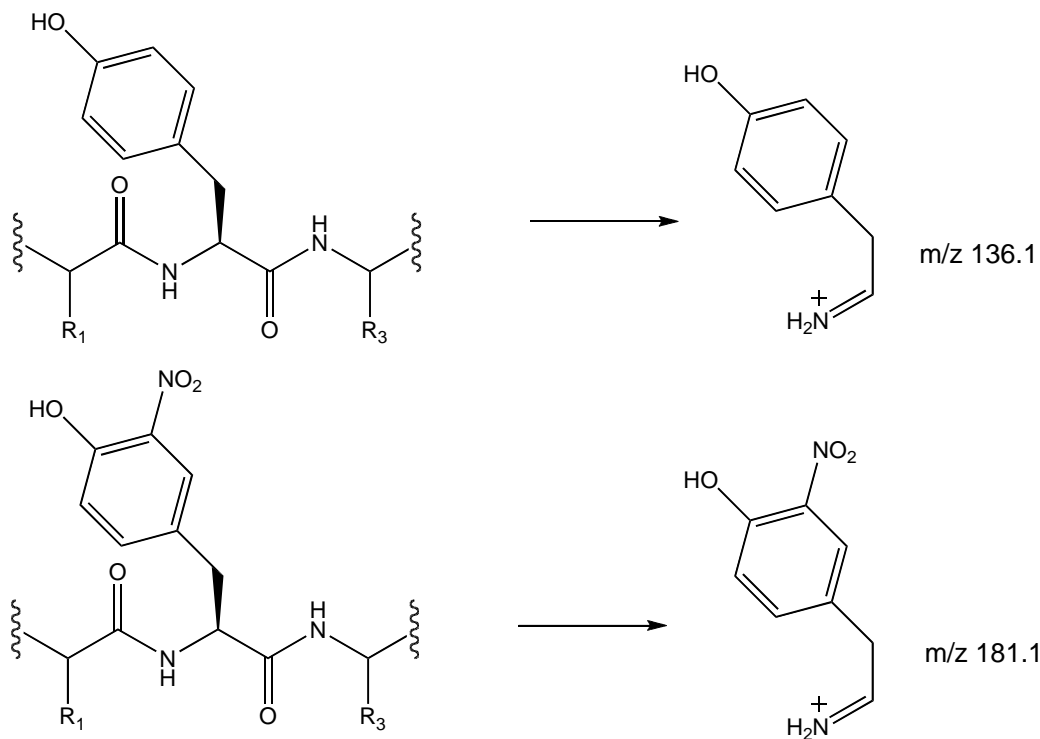

**Supplementary Figure S4.** Tyrosine and 3-nitro-tyrosine in a peptide chain and the corresponding immonium ion products after gas-phase fragmentation
